# Supplementary material for: Prevalence and Outcomes Associated with Idarucizumab Administration in Trauma Patients on Preinjury Dabigatran Therapy: Analyzing Clinical Utilization in 942 Patients from 74 Hospitals
Source: bioRxiv or medRxiv preprint supplement (doi:10.1101/2024.01.12.24301126), 2024-01-13
Supplement: Supplementary file [file media-1.pdf]

## SUPPLEMENTAL FILES

Supplemental files are intended for publication as an online data supplement.

**Supplemental Table 1.** International Classification of Diseases, Tenth Revision, Clinical Modification (ICD-10-CM) Diagnosis Codes

| <b>Diagnosis Category</b>       | <b>ICD-10-CM Codes</b> |       |       |        |       |       |
|---------------------------------|------------------------|-------|-------|--------|-------|-------|
| Nontraumatic hemorrhagic stroke | I60                    | I61   | I62.0 | I62.1  | I62.9 | -     |
| Nontraumatic ischemic stroke    | I63.0                  | I63.1 | I63.2 | I63.3  | I63.4 | I63.5 |
| Atrial fibrillation             | I48.0                  | I48.1 | I48.2 | I48.91 | -     | -     |

**Supplemental Table 2.** The Strengthening the Reporting of Observational Studies in Epidemiology (STROBE) Statement: Guidelines for Reporting Observational Studies

|                              | <b>Item No</b> | <b>Recommendation</b>                                                                                                                                                                             | <b>Complete</b>    |
|------------------------------|----------------|---------------------------------------------------------------------------------------------------------------------------------------------------------------------------------------------------|--------------------|
| <b>Title and abstract</b>    | 1              | (a) Indicate the study's design with a commonly used term in the title or the abstract                                                                                                            | 1                  |
|                              |                | (b) Provide in the abstract an informative and balanced summary of what was done and what was found                                                                                               | 4-5                |
| <b>Introduction</b>          |                |                                                                                                                                                                                                   |                    |
| Background/rationale         | 2              | Explain the scientific background and rationale for the investigation being reported                                                                                                              | 8-9                |
| Objectives                   | 3              | State specific objectives, including any prespecified hypotheses                                                                                                                                  | 9-10               |
| <b>Methods</b>               |                |                                                                                                                                                                                                   |                    |
| Study design                 | 4              | Present key elements of study design early in the paper                                                                                                                                           | 10                 |
| Setting                      | 5              | Describe the setting, locations, and relevant dates, including periods of recruitment, exposure, follow-up, and data collection                                                                   | 11-13, Figure 1    |
| Participants                 | 6              | (a) Give the eligibility criteria, and the sources and methods of selection of participants                                                                                                       | 10-11              |
| Variables                    | 7              | Clearly define all outcomes, exposures, predictors, potential confounders, and effect modifiers. Give diagnostic criteria, if applicable                                                          | 11-12              |
| Data sources/<br>measurement | 8*             | For each variable of interest, give sources of data and details of methods of assessment (measurement). Describe comparability of assessment methods if there is more than one group              | 10-13              |
| Bias                         | 9              | Describe any efforts to address potential sources of bias                                                                                                                                         | 12-13              |
| Study size                   | 10             | Explain how the study size was arrived at                                                                                                                                                         | 11-13, Figure 1    |
| Quantitative variables       | 11             | Explain how quantitative variables were handled in the analyses. If applicable, describe which groupings were chosen and why                                                                      | 10-13              |
| Statistical methods          | 12             | (a) Describe all statistical methods, including those used to control for confounding                                                                                                             | 12-13              |
|                              |                | (b) Describe any methods used to examine subgroups and interactions                                                                                                                               | 12-13              |
|                              |                | (c) Explain how missing data were addressed                                                                                                                                                       | Figure 1           |
|                              |                | (d) If applicable, describe analytical methods taking account of sampling strategy                                                                                                                | N/A                |
|                              |                | (e) Describe any sensitivity analyses                                                                                                                                                             | N/A                |
| <b>Results</b>               |                |                                                                                                                                                                                                   |                    |
| Participants                 | 13*            | (a) Report numbers of individuals at each stage of study—eg numbers potentially eligible, examined for eligibility, confirmed eligible, included in the study, completing follow-up, and analysed | 13-19 and Figure 1 |
|                              |                | (b) Give reasons for non-participation at each stage                                                                                                                                              | Figure 1           |
|                              |                | (c) Consider use of a flow diagram                                                                                                                                                                | Figure 1           |

|                          |     |                                                                                                                                                                                                              |                      |
|--------------------------|-----|--------------------------------------------------------------------------------------------------------------------------------------------------------------------------------------------------------------|----------------------|
| Descriptive data         | 14* | (a) Give characteristics of study participants (eg demographic, clinical, social) and information on exposures and potential confounders                                                                     | 13-15, Table 1       |
|                          |     | (b) Indicate number of participants with missing data for each variable of interest                                                                                                                          | Figure 1             |
| Outcome data             | 15* | Report numbers of outcome events or summary measures                                                                                                                                                         | 13-19                |
| Main results             | 16  | (a) Give unadjusted estimates and, if applicable, confounder-adjusted estimates and their precision (eg, 95% confidence interval). Make clear which confounders were adjusted for and why they were included | 13-19 and Tables 1–3 |
|                          |     | (b) Report category boundaries when continuous variables were categorized                                                                                                                                    | 13-19 and Tables 1–3 |
|                          |     | (c) If relevant, consider translating estimates of relative risk into absolute risk for a meaningful time period                                                                                             | -                    |
| Other analyses           | 17  | Report other analyses done—eg analyses of subgroups and interactions, and sensitivity analyses                                                                                                               | 18-19                |
| <b>Discussion</b>        |     |                                                                                                                                                                                                              |                      |
| Key results              | 18  | Summarise key results with reference to study objectives                                                                                                                                                     | 19-22                |
| Limitations              | 19  | Discuss limitations of the study, taking into account sources of potential bias or imprecision. Discuss both direction and magnitude of any potential bias                                                   | 22-23                |
| Interpretation           | 20  | Give a cautious overall interpretation of results considering objectives, limitations, multiplicity of analyses, results from similar studies, and other relevant evidence                                   | 19-23                |
| Generalisability         | 21  | Discuss the generalisability (external validity) of the study results                                                                                                                                        | 23                   |
| <b>Other information</b> |     |                                                                                                                                                                                                              |                      |
| Funding                  | 22  | Give the source of funding and the role of the funders for the present study and, if applicable, for the original study on which the present article is based                                                | N/A                  |
